# Supplementary material for: Reduced graphene oxide–metal nanoparticle composite membranes for environmental separation and chloro-organic remediation
Source: Royal Society of Chemistry journal article supplement (doi:10.1039/c9ra08178j), 2019-01-01
Supplement: c9ra08178j1.pdf [file c9ra08178j1.pdf]

## Supporting Information

### ***Reduced Graphene Oxide – metal nanoparticles composite membranes for environmental separation and chloro-organic remediation***

*Ashish Aher<sup>1</sup>, Samuel Thompson<sup>1</sup>, Trisha Nickerson<sup>1</sup>, Lindell Ormsbee<sup>2</sup>, and Dibakar Bhattacharyya<sup>1\*</sup>*

*<sup>1</sup>Chemicals and Materials Engineering Department, University of Kentucky, Lexington, KY, USA-40506*

*<sup>2</sup>Civil Engineering Department, University of Kentucky, Lexington, KY, USA-40506*

*\*Corresponding author:*

*Dr. Dibakar Bhattacharyya,*

*University Alumni Chair Professor,*

*Chemical and Materials Engineering, 177 FPAT Bldg.,*

*University of Kentucky, Lexington, KY 40506.*

*Phone: 859-312-7790; Email: db@uky.edu*

**1 Scanning electron microscope (SEM) images of polyvinylidene fluoride (PVDF) commercial membrane:**

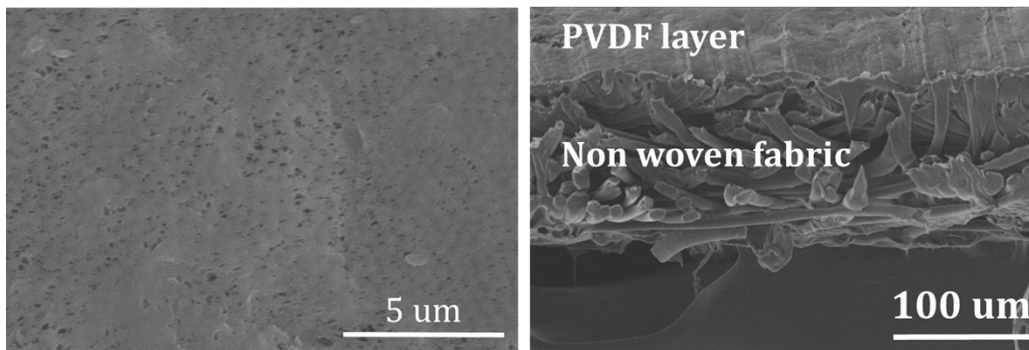

**Figure S1:** SEM images of PVDF substrate used in this study. PVDF substrate was obtained from Nanostone Water Co. Trade name: PV200. The substrate consisted of thin PVDF active layer (110 μm thick) coated on polysulfone substrate and had a pore size of 90-120 nm

**2 Experimental setup:**

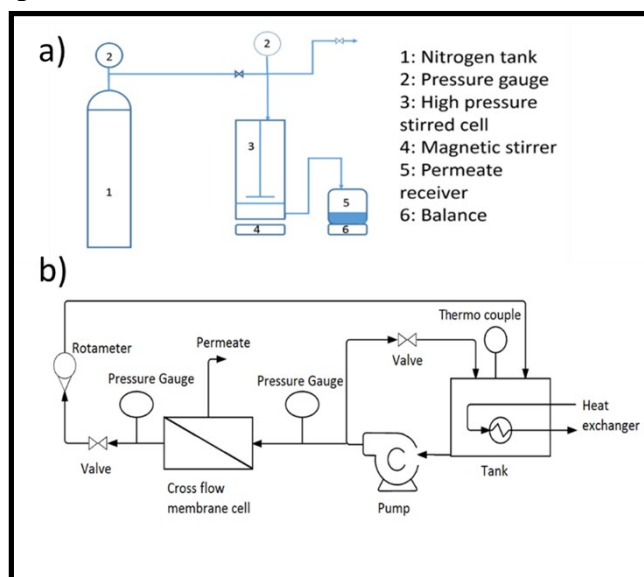

**Figure S2:** Experimental setup for filtration experiment operated in a) dead-end and b) Cross-flow. Dead-end filtration cell: Sterlitech HP4750. Crossflow filtration cell: Sterlitech CF016D.

### 3 Optical images of GO membranes:

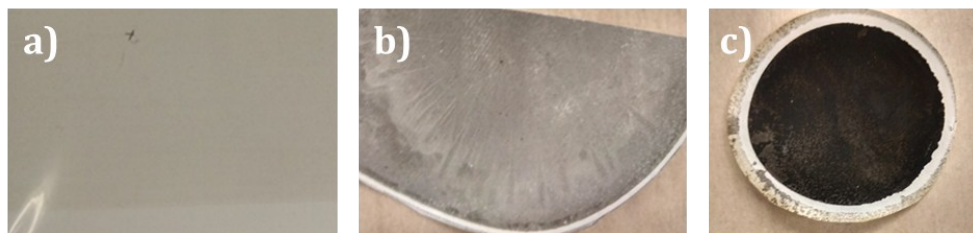

**Figure S3:** Optical images of graphene oxide-based membranes at various stages of synthesis. a) Air-dried GO membrane, b) GO membrane after thermal incubation at 90 °C for 24 hours, and c) Iron palladium nanoparticles embedded nanocomposite GO membranes.

### 4 Energy dispersive spectra of nanocomposite GO layer

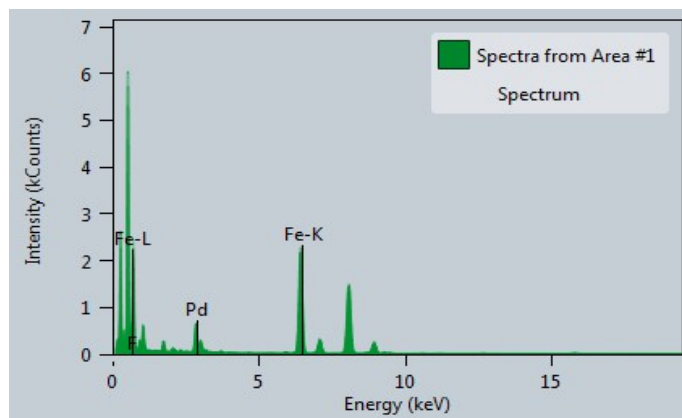

**Figure S4:** Energy dispersive spectrum of nanocomposite rGO layer functionalized with Fe/Pd nanoparticles obtained for functionalized GO layer in TEM.

## 5 X-ray photoelectron spectra for the top surface of the nanocomposite GO membrane:

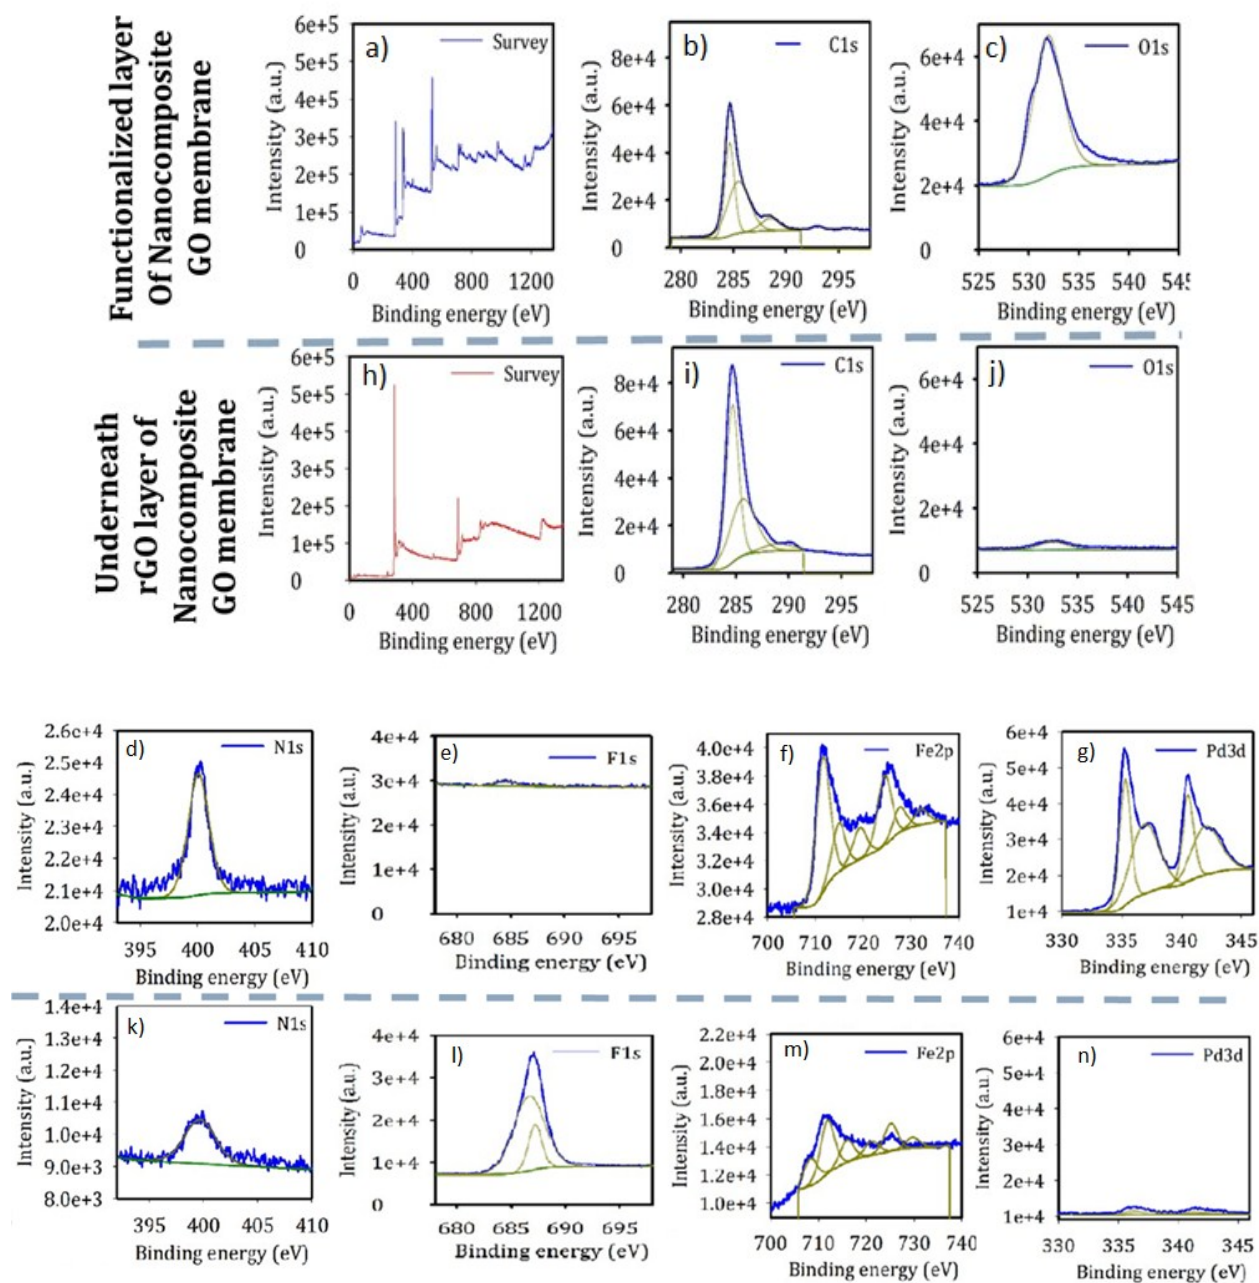

**Figure S5:** XPS spectra of the functionalized layer and underneath the rGO layer of the nanocomposite rGO membrane embedded with Fe-Pd nanoparticles. (a,b,c,d,e,f,g) and (h,i,j,k,l,m,n) shows the spectra for binding energies at the membrane surface and underneath GO layer for Survey, carbon, oxygen, nitrogen, fluorine, iron, and palladium, respectively.

## 6 BET characterization of nanoparticles:

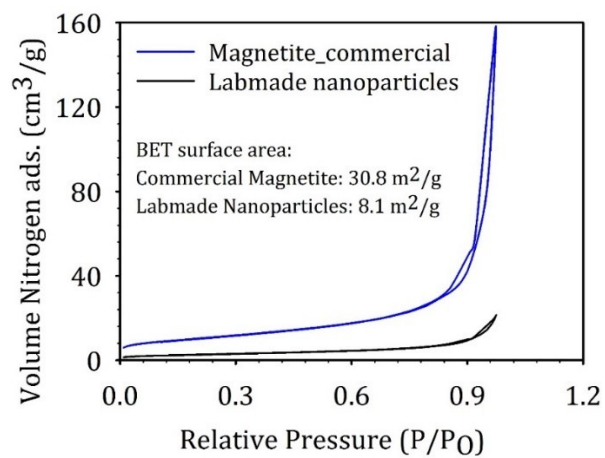

**Figure S6:** BET surface area analysis of lab-made iron nanoparticles (zerovalent) and commercial magnetite nanoparticles. Commercial magnetite nanoparticles were purchased from Sigma Aldrich

## 7 Persulfate decomposition by zerovalent iron:

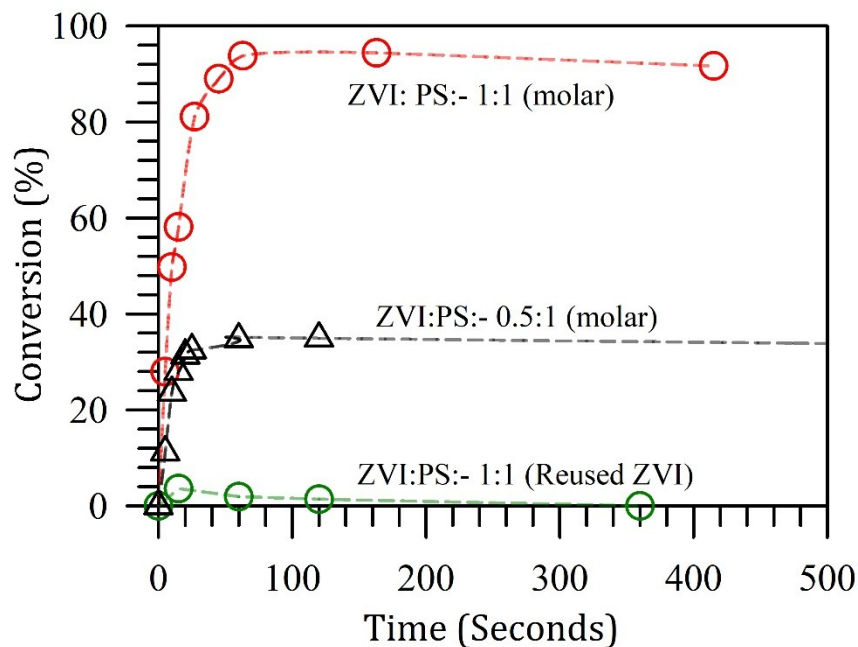

**Figure S7:** Persulfate activation by zerovalent (ZVI) iron in solution phase (with dispersed nanoparticles) and batch mode operation. [persulfate feed]=2mM, Initial pH: 7, Temp: 23°C

## 8 Persulfate decomposition by iron-based nanoparticles:

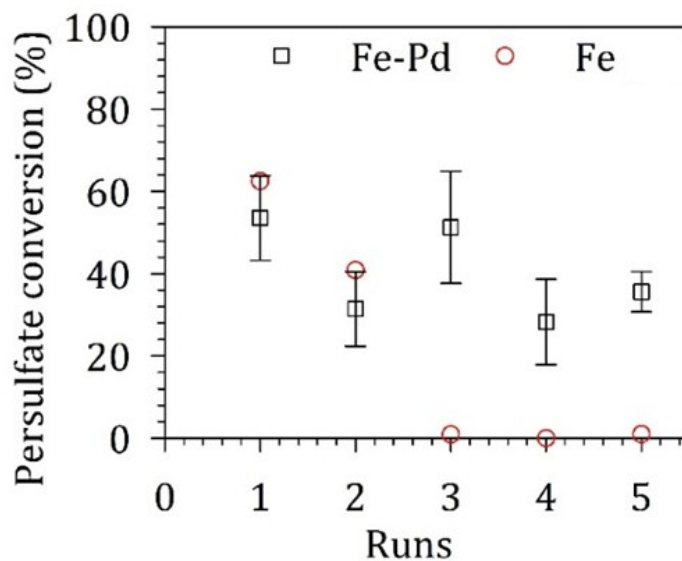

**Figure S8:** Persulfate decomposition by iron and iron-palladium bimetallic nanoparticles. [Persulfate\_feed]=2 mM, [Fe]=2 mM, for Fe-Pd bimetallic nanoparticle, Pd wt%=10, initial pH: 7, temp: 23°C.

## 9 The flux of nanocomposite membranes during persulfate activation

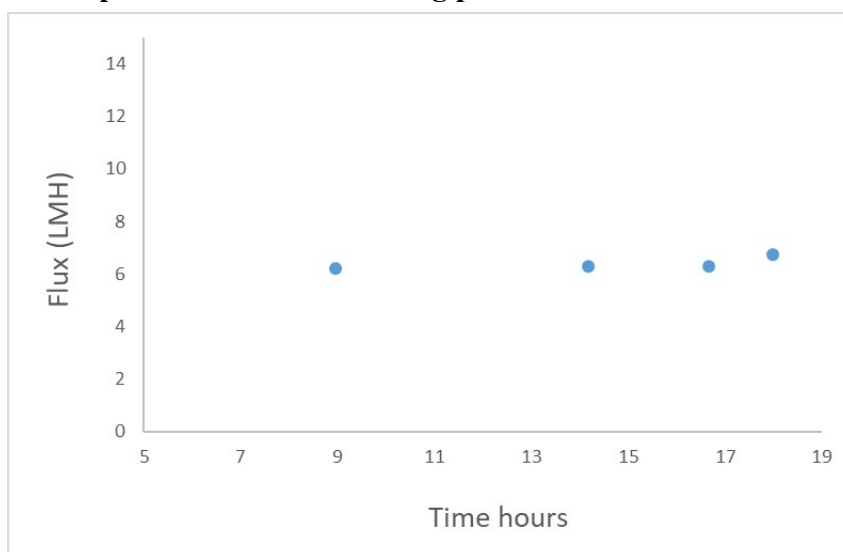

**Figure S9:** Flux of nanocomposite rGO membranes at 1.4 bar pressure during filtration of persulfate solution shown in figure 5

## 10 FTIR and Raman spectra of rGO before and after persulfate exposure.

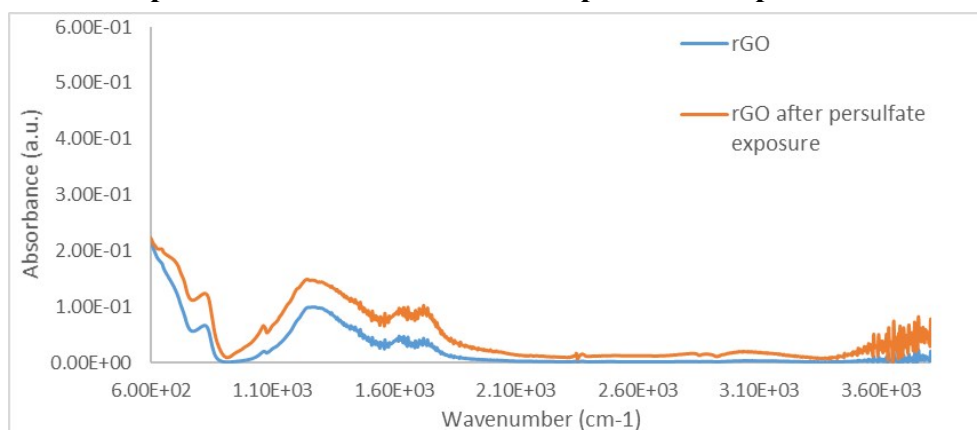

**Figure S10:** FTIR spectra of rGO before and after 72 hrs of persulfate exposure (7.2 mM) at 50°C

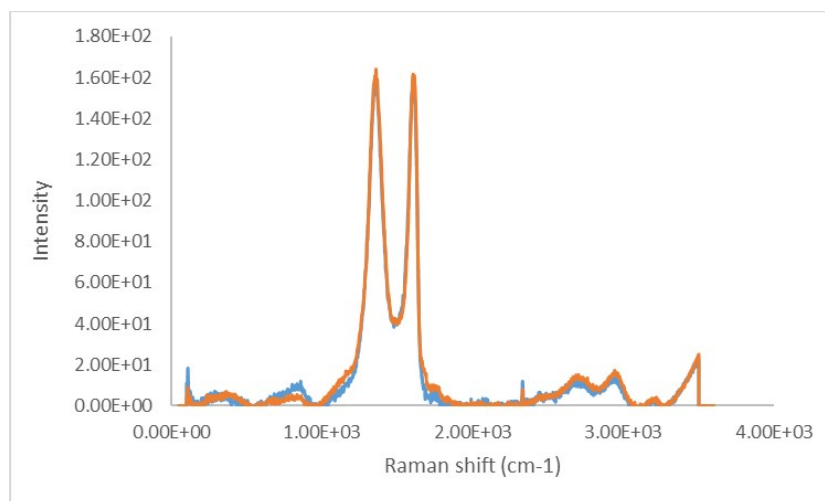

**Figure S11:** Raman spectra of rGO before and after 72 hrs of persulfate exposure (7.2 mM) at 50°C

## 11 Analysis of intermediates during TCE oxidation

### Chromatogram Plot

File: c:\saturnws\data\ashish\07252019\aa\4\_7-25-2019.sms

Sample: 4

Scan Range: 1 - 3194 Time Range: 0.00 - 26.32 min.

Operator: MLC

Date: 7/25/2019 12:38 PM

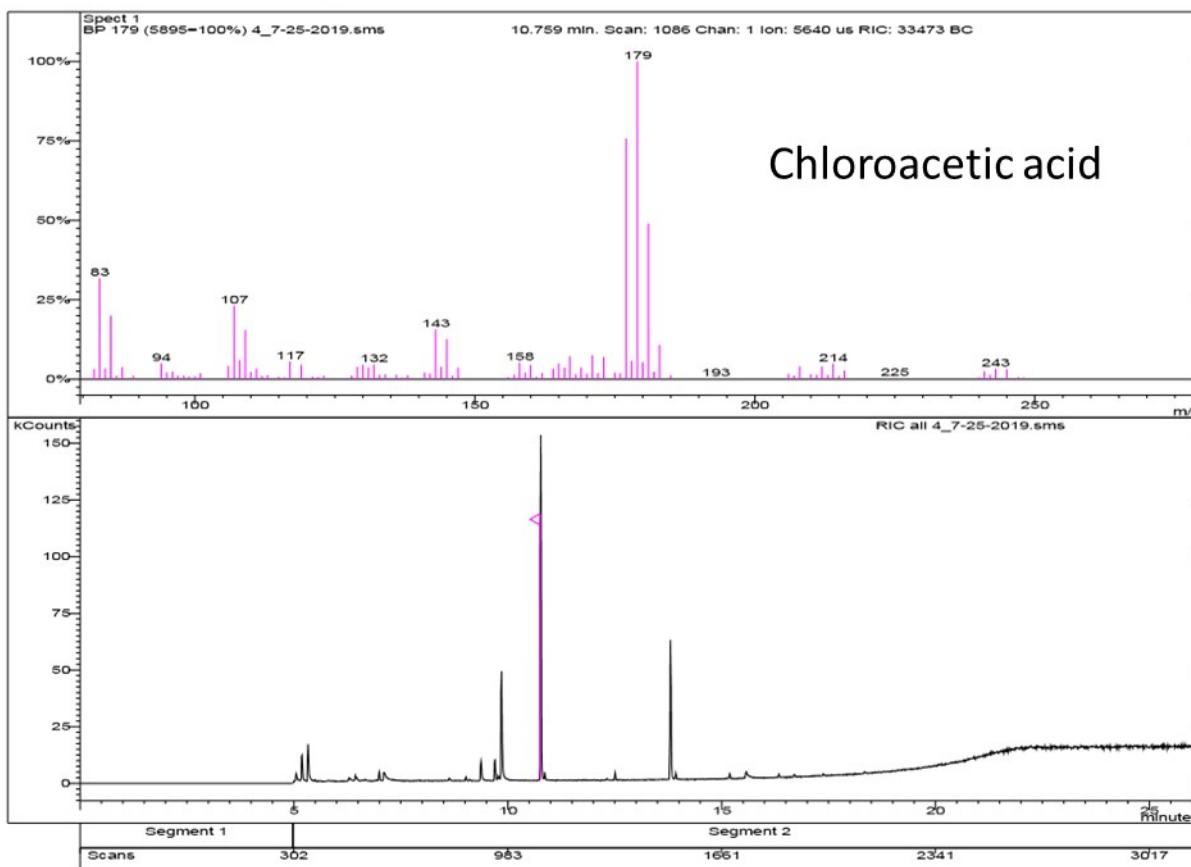

Figure S12: Analysis of TCE oxidation intermediates by GC-MS analysis.

## 12 Salt retention by nanocomposite rGO membranes

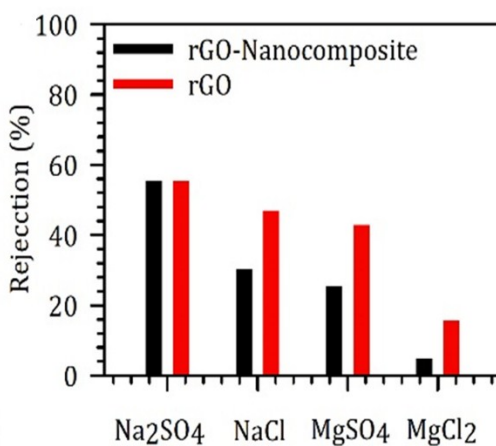

**Figure S13:** Salt retention by rGO and nanocomposite rGO membranes. Salt retention was measured for 7 mM salt feed at an operating pressure of 6.9 bars and average flux of 15 LMH.
